# Supplementary material
Source: PubMed Central journal article supplement (PMC6300166)
Supplement: NIHMS1515430-supplement-1.pdf [file NIHMS1515430-supplement-1.pdf]

## Supporting Information

### Design and Evaluation of Novel Glutaminase Inhibitors

Lee A. McDermott,<sup>a,b\*</sup> Prema Iyer,<sup>a,b</sup> Larry Verneti,<sup>b</sup> Shawn Rimer,<sup>a</sup> Jingran Sun,<sup>a</sup> Melissa Boby,<sup>a</sup> Tianyi Yang,<sup>a</sup> Michael Fioravanti,<sup>a</sup> Jason O'Neil,<sup>a</sup> Liwei Wang,<sup>a</sup> Dylan Drakes,<sup>a</sup> William Katt,<sup>c</sup> Qingqiu Huang,<sup>d</sup> and Richard Cerione<sup>c,e</sup>

<sup>a</sup> University of Pittsburgh, Department of Pharmaceutical Sciences, Pittsburgh PA 15261, USA

<sup>b</sup> University of Pittsburgh Drug Discovery Institute, Pittsburgh PA 15261, USA

<sup>c</sup> Cornell University, Department of Molecular Medicine, Ithaca NY 14853, USA

<sup>d</sup> Cornell University, Laboratory for Accelerator-based Sciences and Education, Ithaca NY 14853, USA

<sup>e</sup> Department of Chemistry and Chemical Biology, Ithaca NY 14853, USA

Refinement characteristics and data collection information for X-ray structures of compounds **7d**, **7e**, **14b** and **14d** in complex with GAC

Rendering of X-ray structure of **14b** in complex with GAC

Supplementary Table1. Data collection and structure refinement statistics

|                                       | <b>GAC/7d</b>                                 | <b>GAC/7e</b>      | <b>GAC/14b</b>                                | <b>GAC/14d</b>      |
|---------------------------------------|-----------------------------------------------|--------------------|-----------------------------------------------|---------------------|
| <b>Data collection</b>                |                                               |                    |                                               |                     |
| Space group                           | P2 <sub>1</sub> 2 <sub>1</sub> 2 <sub>1</sub> | P2 <sub>1</sub>    | P2 <sub>1</sub> 2 <sub>1</sub> 2 <sub>1</sub> | P2 <sub>1</sub>     |
| Cell dimensions                       |                                               |                    |                                               |                     |
| a (Å)                                 | 98.05                                         | 50.69              | 99.17                                         | 49.44               |
| b (Å)                                 | 138.62                                        | 139.03             | 138.83                                        | 137.79              |
| c (Å)                                 | 176.32                                        | 176.78             | 176.65                                        | 175.76              |
| β (°)                                 | 90                                            | 95.56              | 90                                            | 94.68               |
| Resolution (Å)                        | 50-2.3 (2.34-2.30)                            | 50-2.5 (2.56-2.50) | 50-2.3 (2.34-2.30)                            | 50-2.98 (3.05-2.98) |
| No. unique observations               | 107128 (5310)                                 | 80375 (3641)       | 107585 (4899)                                 | 47296 (2396)        |
| Redundancy                            | 7.1 (6.8)                                     | 3.6 (3.3)          | 7.1 (5.9)                                     | 3.6 (3.6)           |
| Completeness (%)                      | 99.9 (100.0)                                  | 98.6 (89.4)        | 98.8 (90.6)                                   | 99.9 (100.0)        |
| Average I/σI                          | 14.9 (2.2)                                    | 11.2 (1.4)         | 14.1 (1.4)                                    | 11.6 (2.7)          |
| R <sub>merge</sub>                    | 0.125                                         | 0.102              | 0.099                                         | 0.243               |
| <b>Structure refinement</b>           |                                               |                    |                                               |                     |
| Resolution (Å)                        | 50-2.5                                        | 50-2.52            | 50-2.5                                        | 50-2.98             |
| R <sub>work</sub> / R <sub>free</sub> | 0.2247/0.2654                                 | 0.2091/0.2526      | 0.2176/0.2669                                 | 0.1730/0.2307       |
| RMS deviations                        |                                               |                    |                                               |                     |
| Bonds(Å)                              | 0.010                                         | 0.010              | 0.084                                         | 0.010               |
| Angles(°)                             | 1.227                                         | 1.099              | 1.037                                         | 1.286               |
| Ramachandran plot                     |                                               |                    |                                               |                     |
| Most favored (%)                      | 95.10                                         | 95.04              | 94.0                                          | 92.16               |
| Allowed (%)                           | 4.17                                          | 4.60               | 4.60                                          | 6.62                |
| <b>PDB code</b>                       | 5FI2                                          | 5FI6               | 5FI7                                          | 5I94                |

\* Values in parentheses are for the highest-resolution shell.

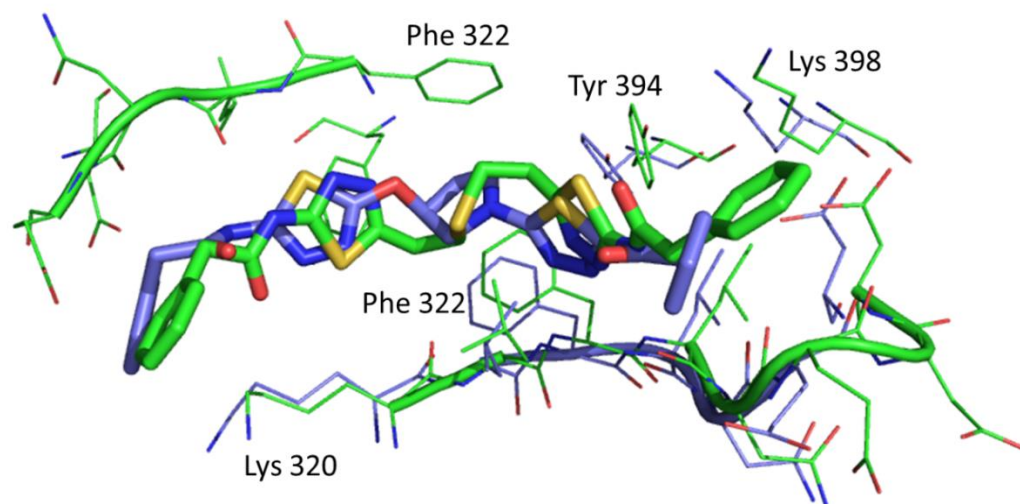

Supplementary Figure 1. X-ray structure of GAC in complex with compound **14b**
